# Supplementary material
Source: publisher site journal article supplement (https://www.e-cmh.org/upload/media/cmh-2023-0057-Supplementary-Fig-10.pdf)
Supplement: Supplementary file 1 [file cmh-2023-0057-Supplementary-Fig-10.pdf]

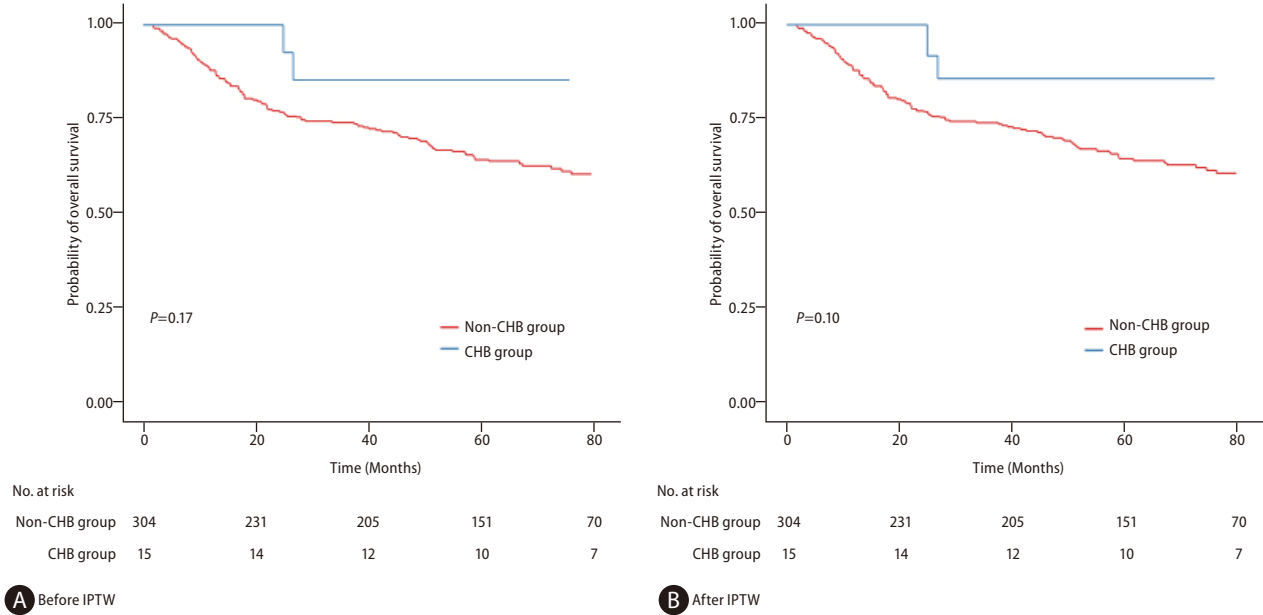

**Supplementary Figure 10.** Kaplan–Meier estimates of OS according to HBV infection status (A) before and (B) after IPTW in the SNUBH subcohort. Propensity scores of inverse probability of treatment weighting were computed using age, sex, Ann Arbor classification, International Prognostic Index risk, germinal center B cell subtype, lactate dehydrogenase, presence of extranodal lesions, bone marrow involvement, and cirrhosis. Abbreviations: CHB, chronic hepatitis B; HBV, hepatitis B virus; OS, overall survival; SNUBH; Seoul National University Bundang Hospital.
